# Supplementary material
Source: Springer Nature journal article supplement (https://www.springermedizin.de/resource/supplementary/12950_2010_167_MOESM2_ESM.pdf/9558104)

TIMP-1 (pg/mL x 10)

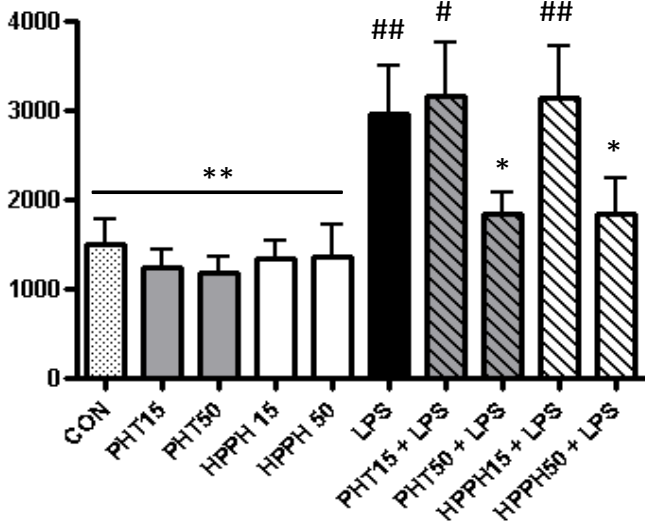

Supplement: MOESM2 [file 9558104]
